# Supplementary material for: The Nutritional Quality of Lunch Meals Eaten at Danish Worksites
Source: MDPI journal article supplement (doi:10.3390/nu10101518), 2018-10-16
Supplement: s1 [file s1]

# Supplementary Materials

Kantineundersøgelse 2014

 Danmarks  
Tekniske Universitet
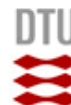

## Spørgsmål om dig selv og din brug af kantinen

 1. Er du mand eller kvinde? ☐ Kvinde ☐ Mand

2. Hvad er din alder? \_\_\_\_\_ år

3. Hvad er din hovedbeskæftigelse på virksomheden? (sæt ét kryds for hvad der passer bedst)

- ☐ Arbejder, faglært  
☐ Arbejder, ufaglært/specialarbejder  
☐ Funktionær/tjenestemand  
☐ Lærling, elev  
☐ Andet, noter venligst: \_\_\_\_\_

4. Hvad er din højeste fuldførte uddannelse? (sæt ét kryds for hvad der passer bedst)

- ☐ Grundskole  
☐ Studenter/HF-eksamen (inkl. HHX og HTX)  
☐ Erhvervsfaglig uddannelse (fx håndværk, handel, kontor)  
☐ Kort videregående uddannelse (fx social- og sundhedsassistent, merkonom)  
☐ Mellemlang/lang videregående uddannelse (fx skolelærer, bachelor, cand.mag., læge)  
☐ Anden uddannelse, noter venligst: \_\_\_\_\_

 5. Hvor tit spiser du typisk mad fra kantinen? (sæt ét kryds ved hver linje)

|           | 5 gange<br>om ugen<br>eller<br>oftere | 3-4 gange<br>om ugen     | 1-2 gange<br>om ugen     | 2-3 gange<br>pr. måned   | Ca. 1 gang<br>pr. måned  | Ca. hver<br>anden<br>måned eller<br>sjældnere | Aldrig                   |
|-----------|---------------------------------------|--------------------------|--------------------------|--------------------------|--------------------------|-----------------------------------------------|--------------------------|
| Morgenmad | <input type="checkbox"/>              | <input type="checkbox"/> | <input type="checkbox"/> | <input type="checkbox"/> | <input type="checkbox"/> | <input type="checkbox"/>                      | <input type="checkbox"/> |
| Frokost   | <input type="checkbox"/>              | <input type="checkbox"/> | <input type="checkbox"/> | <input type="checkbox"/> | <input type="checkbox"/> | <input type="checkbox"/>                      | <input type="checkbox"/> |

 6. Hvad lagde du vægt på, da du valgte dit måltid i dag? (sæt max 3 krydser)

- |                                                                         |                                                                   |
|-------------------------------------------------------------------------|-------------------------------------------------------------------|
| <input type="checkbox"/> Den mad der så mest appetitlig og fristende ud | <input type="checkbox"/> Madens miljøbelastning                   |
| <input type="checkbox"/> Den mad der var mest rimelig i pris            | <input type="checkbox"/> Noget nyt jeg ikke havde smagt før       |
| <input type="checkbox"/> Den mad jeg opfattede som mest sund            | <input type="checkbox"/> Jeg blev fristet af tilbud/reklameskilte |
| <input type="checkbox"/> Den mad jeg plejer at spise                    | <input type="checkbox"/> Andet: _____                             |
| <input type="checkbox"/> Den mad som virkede mest mættende              | _____                                                             |

## Kantineundersøgelse 2014

7. Hvordan vil du generelt vurdere kantinens mad? (Sæt ét kryds for hver linje)

|                         | Nej,<br>slet ikke        | Nej,<br>i mindre grad    | Ja, til<br>en vis grad   | Ja,<br>i høj grad        | Ved<br>ikke              |
|-------------------------|--------------------------|--------------------------|--------------------------|--------------------------|--------------------------|
| Maden ser appetitlig ud | <input type="checkbox"/> | <input type="checkbox"/> | <input type="checkbox"/> | <input type="checkbox"/> | <input type="checkbox"/> |
| Smagen er god           | <input type="checkbox"/> | <input type="checkbox"/> | <input type="checkbox"/> | <input type="checkbox"/> | <input type="checkbox"/> |
| Maden er sund           | <input type="checkbox"/> | <input type="checkbox"/> | <input type="checkbox"/> | <input type="checkbox"/> | <input type="checkbox"/> |
| Prisen er passende      | <input type="checkbox"/> | <input type="checkbox"/> | <input type="checkbox"/> | <input type="checkbox"/> | <input type="checkbox"/> |

8. I hvor høj grad er du enig i følgende udsagn? (Sæt ét kryds for hver linje)

|                                                           | Meget<br>uenig           | Uenig                    | Hverken<br>enig eller<br>uenig | Enig                     | Meget<br>enig            |
|-----------------------------------------------------------|--------------------------|--------------------------|--------------------------------|--------------------------|--------------------------|
| Jeg er generelt tilfreds med kantinekosten                | <input type="checkbox"/> | <input type="checkbox"/> | <input type="checkbox"/>       | <input type="checkbox"/> | <input type="checkbox"/> |
| Det er nemt at finde og vælge sund mad fra kantinekosten  | <input type="checkbox"/> | <input type="checkbox"/> | <input type="checkbox"/>       | <input type="checkbox"/> | <input type="checkbox"/> |
| Jeg ønsker mere fokus på smagen i kantinekosten           |                          |                          |                                |                          |                          |
| Jeg ønsker mere miljøvenlig mad i kantinekosten           | <input type="checkbox"/> | <input type="checkbox"/> | <input type="checkbox"/>       | <input type="checkbox"/> | <input type="checkbox"/> |
| Jeg ønsker mere økologisk mad i kantinekosten             | <input type="checkbox"/> | <input type="checkbox"/> | <input type="checkbox"/>       | <input type="checkbox"/> | <input type="checkbox"/> |
| Jeg ønsker et større udbud af sundere mad i kantinekosten | <input type="checkbox"/> | <input type="checkbox"/> | <input type="checkbox"/>       | <input type="checkbox"/> | <input type="checkbox"/> |

Har du andre ønsker/kommentarer til kantinens mad?

## 9. Bestreber du dig dagligt på at spise sundt? (Sæt ét kryds for hvad der passer bedst)

☐ Ja, meget ofte   
 ☐ Ja, ofte   
 ☐ En gang imellem   
 ☐ Nej, aldrig   
 ☐ Ved ikke

10. Hvor høj er du? \_\_\_\_\_ cm.

11. Hvad vejer du? \_\_\_\_\_ kg. (For gravide: vægt før graviditet)

**Mange tak fordi du besvarede spørgeskemaet :-)**  
**Besvarelsen er anonym**

Figure S1. Demographic data collection (in Danish).
